# Supplementary material
Source: publisher figshare collection journal article supplement (https://sage.figshare.com/ndownloader/files/32394702)
Supplement: Supplementary file 1 [file 32394702]

Archive with 38 entries (38 files):
- outputViewer0000000000.xml
- 00000000011_lightNotesData.bin
- 00000000013_lightTableData.bin
- 00000000014_lightTableData.bin
- outputViewer0000000001_heading.xml
- outputViewer0000000002.xml
- 00000000031_lightNotesData.bin
- 00000000032_lightTableData.bin
- 00000000033_lightTableData.bin
- 00000000034_lightTableData.bin
- 00000000035_lightTableData.bin
- 00000000036_lightTableData.bin
- outputViewer0000000003_heading.xml
- outputViewer0000000004.xml
- 00000000051_lightNotesData.bin
- 00000000052_lightTableData.bin
- 00000000053_lightTableData.bin
- 00000000054_lightTableData.bin
- 00000000055_lightTableData.bin
- 00000000056_lightTableData.bin
- outputViewer0000000005_heading.xml
- outputViewer0000000006.xml
- 00000000071_lightNotesData.bin
- 00000000072_lightTableData.bin
- 00000000073_lightTableData.bin
- 00000000074_lightTableData.bin
- 00000000075_lightTableData.bin
- 00000000076_lightTableData.bin
- outputViewer0000000007_heading.xml
- outputViewer0000000008.xml
- 00000000091_lightNotesData.bin
- 00000000092_lightTableData.bin
- 00000000093_lightTableData.bin
- 00000000094_lightTableData.bin
- 00000000095_lightTableData.bin
- 00000000096_lightTableData.bin
- outputViewer0000000009_heading.xml
- META-INF/MANIFEST.MF
