# Supplementary material
Source: publisher figshare collection journal article supplement (https://sage.figshare.com/ndownloader/files/32394702)
Supplement: Supplementary file 1 [file 32394702 › outputViewer0000000000.xml]

<?xml version="1.0" encoding="UTF-8"?><heading creation-date-time="Friday, September 24, 2021 9:00:39 PM PDT" creator="C:\PROGRA~2\IBM\SPSS\STATIS~1\24" creator-version="24000000" lockReader="false" xmlns="http://xml.spss.com/spss/viewer/viewer-tree" xmlns:vgr="http://xml.spss.com/spss/viewer/viewer-graph" xmlns:vizml="http://xml.spss.com/visualization" xmlns:vmd="http://xml.spss.com/spss/viewer/viewer-model" xmlns:vps="http://xml.spss.com/spss/viewer/viewer-pagesetup" xmlns:vst="http://xml.spss.com/spss/viewer/viewer-style" xmlns:vtb="http://xml.spss.com/spss/viewer/viewer-table" xmlns:vtl="http://xml.spss.com/spss/viewer/table-looks" xmlns:vtt="http://xml.spss.com/spss/viewer/viewer-treemodel" xmlns:vtx="http://xml.spss.com/spss/viewer/viewer-text" xmlns:xsi="http://www.w3.org/2001/XMLSchema-instance" xsi:schemaLocation="http://xml.spss.com/spss/viewer/viewer-tree http://xml.spss.com/spss/viewer/viewer-tree-1.2.xsd"><label>Output</label><container text-align="left" visibility="visible" width="1267px"><label>Log</label><vtx:text commandName="log" type="log"><html lang="en" xmlns="http://www.w3.org/1999/xhtml"><![CDATA[<head><style type="text/css">p{color:0;font-family:Monospaced;font-size:14pt;font-style:normal;font-weight:normal;text-decoration:none}</style></head><BR>
Your temporary usage period for IBM SPSS Statistics will expire in 5211 days.

GET
  FILE='D:\FACULTY\RESEARCH\COVID 19\JOURNAL SUBMISSION\HEALTH BELIEFS AND COVID-19_JOHP.sav'.
DATASET NAME DataSet1 WINDOW=FRONT.
DATASET ACTIVATE DataSet1.
USE ALL.
COMPUTE filter_$=(filter_$ = 1).
VARIABLE LABELS filter_$ 'filter_$ = 1 (FILTER)'.
VALUE LABELS filter_$ 0 'Not Selected' 1 'Selected'.
FORMATS filter_$ (f1.0).
FILTER BY filter_$.
EXECUTE.
CORRELATIONS
  /VARIABLES=EFFICACY_CLEAN DN_CLEAN IN_CLEANING BI_CLEAN EFFICACY_SD DN_SD IN_SD BI_SD EFFICACY_HW
    DN_HW IN_HW BI_HW EFFICACY_fm DN_FM IN_FM BI_FM RISK
  /PRINT=TWOTAIL NOSIG
  /STATISTICS DESCRIPTIVES
  /MISSING=LISTWISE.]]></html></vtx:text></container></heading>
