# Supplementary material
Source: publisher figshare collection journal article supplement (https://sage.figshare.com/ndownloader/files/32394702)
Supplement: Supplementary file 1 [file 32394702 › outputViewer0000000001_heading.xml]

<?xml version="1.0" encoding="UTF-8"?><heading creation-date-time="Friday, September 24, 2021 9:00:39 PM PDT" creator="C:\PROGRA~2\IBM\SPSS\STATIS~1\24" creator-version="24000000" xmlns="http://xml.spss.com/spss/viewer/viewer-tree" xmlns:vgr="http://xml.spss.com/spss/viewer/viewer-graph" xmlns:vizml="http://xml.spss.com/visualization" xmlns:vmd="http://xml.spss.com/spss/viewer/viewer-model" xmlns:vps="http://xml.spss.com/spss/viewer/viewer-pagesetup" xmlns:vst="http://xml.spss.com/spss/viewer/viewer-style" xmlns:vtb="http://xml.spss.com/spss/viewer/viewer-table" xmlns:vtl="http://xml.spss.com/spss/viewer/table-looks" xmlns:vtt="http://xml.spss.com/spss/viewer/viewer-treemodel" xmlns:vtx="http://xml.spss.com/spss/viewer/viewer-text" xmlns:xsi="http://www.w3.org/2001/XMLSchema-instance" xsi:schemaLocation="http://xml.spss.com/spss/viewer/viewer-tree http://xml.spss.com/spss/viewer/viewer-tree-1.2.xsd"><label>Output</label><heading commandName="Correlations" creator-version="24000000" locale="en-US" olang="en"><label>Correlations</label><container text-align="left" visibility="visible" width="1267px"><label>Title</label><vtx:text commandName="Correlations" creator-version="24000000" type="title"><html lang="en" xmlns="http://www.w3.org/1999/xhtml"><![CDATA[<head><style type="text/css">p{color:0;font-family:SansSerif;font-size:18pt;font-style:normal;font-weight:bold;text-decoration:none}</style></head><BR>Correlations]]></html></vtx:text></container><container text-align="left" visibility="hidden"><label>Notes</label><vtb:table commandName="Correlations" creator-version="24000000" subType="Notes" tableId="-3921978095338258431" type="note"><vtb:tableStructure><vtb:dataPath>00000000011_lightNotesData.bin</vtb:dataPath></vtb:tableStructure></vtb:table></container><container text-align="left" visibility="visible" width="1267px"><label>Active Dataset</label><vtx:text commandName="Correlations" creator-version="24000000" type="text"><html lang="en" xmlns="http://www.w3.org/1999/xhtml"><![CDATA[<head><style type="text/css">p{color:0;font-family:Monospaced;font-size:14pt;font-style:normal;font-weight:normal;text-decoration:none}</style></head><BR>[DataSet1]&nbsp;D:\FACULTY\RESEARCH\COVID&nbsp;19\JOURNAL&nbsp;SUBMISSION\HEALTH&nbsp;BELIEFS&nbsp;AND&nbsp;COVID-19_JOHP.sav]]></html></vtx:text></container><container text-align="left" visibility="visible"><label>Descriptive Statistics</label><vtb:table commandName="Correlations" creator-version="24000000" subType="Descriptive Statistics" tableId="-3921978095338258429" type="table"><vtb:tableStructure><vtb:dataPath>00000000013_lightTableData.bin</vtb:dataPath></vtb:tableStructure></vtb:table></container><container text-align="left" visibility="visible"><label>Correlations</label><vtb:table commandName="Correlations" creator-version="24000000" subType="Correlations" tableId="-3921978095338258428" type="table"><vtb:tableStructure><vtb:dataPath>00000000014_lightTableData.bin</vtb:dataPath></vtb:tableStructure></vtb:table></container></heading></heading>
