# Supplementary material
Source: publisher figshare collection journal article supplement (https://sage.figshare.com/ndownloader/files/32394702)
Supplement: Supplementary file 1 [file 32394702 › outputViewer0000000004.xml]

<?xml version="1.0" encoding="UTF-8"?><heading creation-date-time="Friday, September 24, 2021 9:00:39 PM PDT" creator="C:\PROGRA~2\IBM\SPSS\STATIS~1\24" creator-version="24000000" xmlns="http://xml.spss.com/spss/viewer/viewer-tree" xmlns:vgr="http://xml.spss.com/spss/viewer/viewer-graph" xmlns:vizml="http://xml.spss.com/visualization" xmlns:vmd="http://xml.spss.com/spss/viewer/viewer-model" xmlns:vps="http://xml.spss.com/spss/viewer/viewer-pagesetup" xmlns:vst="http://xml.spss.com/spss/viewer/viewer-style" xmlns:vtb="http://xml.spss.com/spss/viewer/viewer-table" xmlns:vtl="http://xml.spss.com/spss/viewer/table-looks" xmlns:vtt="http://xml.spss.com/spss/viewer/viewer-treemodel" xmlns:vtx="http://xml.spss.com/spss/viewer/viewer-text" xmlns:xsi="http://www.w3.org/2001/XMLSchema-instance" xsi:schemaLocation="http://xml.spss.com/spss/viewer/viewer-tree http://xml.spss.com/spss/viewer/viewer-tree-1.2.xsd"><label>Output</label><container text-align="left" visibility="visible" width="1267px"><label>Log</label><vtx:text commandName="log" type="log"><html lang="en" xmlns="http://www.w3.org/1999/xhtml"><![CDATA[<head><style type="text/css">p{color:0;font-family:Monospaced;font-size:14pt;font-style:normal;font-weight:normal;text-decoration:none}</style></head><BR>REGRESSION
  /MISSING LISTWISE
  /STATISTICS COEFF OUTS R ANOVA
  /CRITERIA=PIN(.05) POUT(.10)
  /NOORIGIN
  /DEPENDENT BI_SD
  /METHOD=ENTER BEHAVIOR_SD Religion1 Order_stay_effective Income Poli_Ide2_1
  /METHOD=ENTER cent_risk cent_efficacy_sd cent_in_sd cent_dn_sd
  /METHOD=ENTER INT_EFF_RISK_SD int_IN_DN_sd int_DN_EFF_SD INT_DN_RISK_SD.]]></html></vtx:text></container></heading>
