# Supplementary material
Source: publisher figshare collection journal article supplement (https://sage.figshare.com/ndownloader/files/32394702)
Supplement: Supplementary file 1 [file 32394702 › outputViewer0000000007_heading.xml]

<?xml version="1.0" encoding="UTF-8"?><heading creation-date-time="Friday, September 24, 2021 9:00:39 PM PDT" creator="C:\PROGRA~2\IBM\SPSS\STATIS~1\24" creator-version="24000000" xmlns="http://xml.spss.com/spss/viewer/viewer-tree" xmlns:vgr="http://xml.spss.com/spss/viewer/viewer-graph" xmlns:vizml="http://xml.spss.com/visualization" xmlns:vmd="http://xml.spss.com/spss/viewer/viewer-model" xmlns:vps="http://xml.spss.com/spss/viewer/viewer-pagesetup" xmlns:vst="http://xml.spss.com/spss/viewer/viewer-style" xmlns:vtb="http://xml.spss.com/spss/viewer/viewer-table" xmlns:vtl="http://xml.spss.com/spss/viewer/table-looks" xmlns:vtt="http://xml.spss.com/spss/viewer/viewer-treemodel" xmlns:vtx="http://xml.spss.com/spss/viewer/viewer-text" xmlns:xsi="http://www.w3.org/2001/XMLSchema-instance" xsi:schemaLocation="http://xml.spss.com/spss/viewer/viewer-tree http://xml.spss.com/spss/viewer/viewer-tree-1.2.xsd"><label>Output</label><heading commandName="Regression" creator-version="24000000" locale="en-US" olang="en"><label>Regression</label><container text-align="left" visibility="visible" width="1267px"><label>Title</label><vtx:text commandName="Regression" creator-version="24000000" type="title"><html lang="en" xmlns="http://www.w3.org/1999/xhtml"><![CDATA[<head><style type="text/css">p{color:0;font-family:SansSerif;font-size:18pt;font-style:normal;font-weight:bold;text-decoration:none}</style></head><BR>Regression]]></html></vtx:text></container><container text-align="left" visibility="hidden"><label>Notes</label><vtb:table commandName="Regression" creator-version="24000000" subType="Notes" tableId="-3921978095335112703" type="note"><vtb:tableStructure><vtb:dataPath>00000000071_lightNotesData.bin</vtb:dataPath></vtb:tableStructure></vtb:table></container><container text-align="left" visibility="visible"><label>Variables Entered/Removed</label><vtb:table commandName="Regression" creator-version="24000000" subType="Variables Entered Removed" tableId="-3921978095335112701" type="table"><vtb:tableStructure><vtb:dataPath>00000000072_lightTableData.bin</vtb:dataPath></vtb:tableStructure></vtb:table></container><container text-align="left" visibility="visible"><label>Model Summary</label><vtb:table commandName="Regression" creator-version="24000000" subType="Model Summary" tableId="-3921978095335112700" type="table"><vtb:tableStructure><vtb:dataPath>00000000073_lightTableData.bin</vtb:dataPath></vtb:tableStructure></vtb:table></container><container text-align="left" visibility="visible"><label>ANOVA</label><vtb:table commandName="Regression" creator-version="24000000" subType="ANOVA" tableId="-3921978095335112699" type="table"><vtb:tableStructure><vtb:dataPath>00000000074_lightTableData.bin</vtb:dataPath></vtb:tableStructure></vtb:table></container><container text-align="left" visibility="visible"><label>Coefficients</label><vtb:table commandName="Regression" creator-version="24000000" subType="Coefficients" tableId="-3921978095335112698" type="table"><vtb:tableStructure><vtb:dataPath>00000000075_lightTableData.bin</vtb:dataPath></vtb:tableStructure></vtb:table></container><container text-align="left" visibility="visible"><label>Excluded Variables</label><vtb:table commandName="Regression" creator-version="24000000" subType="Excluded Variables" tableId="-3921978095335112697" type="table"><vtb:tableStructure><vtb:dataPath>00000000076_lightTableData.bin</vtb:dataPath></vtb:tableStructure></vtb:table></container></heading></heading>
